# Supplementary material for: The database of chromosome imbalance regions and genes resided in lung cancer from Asian and Caucasian identified by array-comparative genomic hybridization
Source: PubMed Central journal article supplement (PMC3488578; doi:10.1186/1471-2407-12-235), 2012-06-12
Supplement: 1471-2407-12-235-S2.pdf [file 1471-2407-12-235-S2.pdf]

**Table S2. The selected 18 chromosome regions investigated in the current array-CGH study.**

| Chromosome | Cytoband      | Length (Mb) | BAC number | LOH frequency <sup>a</sup> |
|------------|---------------|-------------|------------|----------------------------|
| 2          | 2p22.1-25.1   | 30.4        | 259        | 47%                        |
|            | 2q34-36.1     | 12.2        | 154        | 64%                        |
| 3          | 3p11.2-26.3   | 90.3        | 810        | 47%                        |
| 4          | 4p15.1-15.31  | 11.2        | 128        | 56%                        |
|            | 4q33-34.2     | 10.4        | 96         | 51%                        |
| 6          | 6p12.3-21.2   | 11.7        | 436        | 56%                        |
|            | 6p22.1-22.3   | 8.3         | 383        | 43%                        |
| 9          | 9q21.1-21.3   | 8.6         | 85         | 47%                        |
| 10         | 10q21.3-25.1  | 40.5        | 426        | 37%                        |
| 12         | 12p13.1-13.33 | 11.0        | 99         | 45%                        |
|            | 12q14.1-15    | 9.0         | 74         | 59%                        |
| 13         | 13q12.3-14.2  | 11.0        | 115        | 62%                        |
| 17         | 17p12-13.3    | 13.7        | 118        | 57%                        |
|            | 17q24.2-25.3  | 17.0        | 150        | 47%                        |
| X          | Xp22.11       | 3.1         | 23         | --                         |
|            | Xp22.31-22.13 | 13.2        | 94         | --                         |
|            | Xq21.31-21.33 | 12.1        | 84         | --                         |
|            | Xq25-26.1     | 9.4         | 70         | --                         |
| Overall    | 18            | 323.1       | 3604       | >45%                       |

<sup>a</sup> LOH frequency in some selected chromosome region is less than 45% because these regions are important chromosome regions associated with clinicopathological parameters in our previous LOH study [1].

## References

1. Tseng RC, Chang JW, Hsien FJ, Chang YH, Hsiao CF, Chen JT, Chen CY, Jou YS, Wang YC: **Genomewide loss of heterozygosity and its clinical associations in non small cell lung cancer**. *Int J Cancer* 2005, **117**:241-247.
