# Supplementary material for: The database of chromosome imbalance regions and genes resided in lung cancer from Asian and Caucasian identified by array-comparative genomic hybridization
Source: PubMed Central journal article supplement (PMC3488578; doi:10.1186/1471-2407-12-235), 2012-06-12
Supplement: 1471-2407-12-235-S6.pdf [file 1471-2407-12-235-S6.pdf]

**Table S5. Association between mRNA expression level and lung cancer clinicopathological parameters of four candidate genes in Asian <sup>a</sup>.**

| Characteristics                       | Total <sup>b</sup><br>n | <u>ARHGAP19</u>                      |                            | <u>FRAT2</u>                         |                            | <u>PAFAH1B1</u>                      |                 | <u>ZNF322A</u>                       |                 |           |
|---------------------------------------|-------------------------|--------------------------------------|----------------------------|--------------------------------------|----------------------------|--------------------------------------|-----------------|--------------------------------------|-----------------|-----------|
|                                       |                         | overexpression <sup>c</sup><br>n (%) | Normal<br>n (%)            | overexpression <sup>c</sup><br>n (%) | Normal<br>n (%)            | overexpression <sup>c</sup><br>n (%) | Normal<br>n (%) | overexpression <sup>c</sup><br>n (%) | Normal<br>n (%) |           |
| Overall                               | 45                      | 33 (73.3)                            | 12 (26.7)                  | 23 (51.1)                            | 22 (48.9)                  | 31 (68.9)                            | 14 (31.1)       | 27 (60.0)                            | 18 (40.0)       |           |
| <u>Clinicopathological parameters</u> |                         |                                      |                            |                                      |                            |                                      |                 |                                      |                 |           |
| Age                                   | < 65                    | 22                                   | 13 (59.1)                  | 9 (40.9)                             | 10 (45.5)                  | 12 (54.5)                            | 15 (68.2)       | 7 (31.1)                             | 14 (63.6)       | 8 (36.4)  |
|                                       | ≥ 65                    | 23                                   | 20 (87.9) <sup>0.035</sup> | 3 (13.1)                             | 13 (56.5)                  | 10 (43.5)                            | 16 (69.6)       | 7 (30.4)                             | 13 (56.5)       | 10 (43.5) |
| Sex                                   | Male                    | 36                                   | 29 (80.6) <sup>0.028</sup> | 7 (19.4)                             | 18 (50.0)                  | 18 (50.0)                            | 25 (69.4)       | 11 (30.6)                            | 18 (50)         | 18 (50)   |
|                                       | Female                  | 9                                    | 4 (44.4)                   | 5 (55.6)                             | 5 (55.6)                   | 4 (44.4)                             | 6 (66.7)        | 3 (33.3)                             | 5 (55.6)        | 4 (44.4)  |
| Smoker                                | Yes                     | 18                                   | 15 (83.3) <sup>0.019</sup> | 3 (16.7)                             | 7 (38.8)                   | 11 (61.2)                            | 14 (77.8)       | 4 (22.2)                             | 11 (61.1)       | 7 (38.9)  |
|                                       | No                      | 8                                    | 3 (37.5)                   | 5 (62.5)                             | 5 (62.5)                   | 3 (37.5)                             | 5 (62.5)        | 3 (37.5)                             | 6 (75.0)        | 2 (25.0)  |
| <u>Tumor type</u>                     |                         |                                      |                            |                                      |                            |                                      |                 |                                      |                 |           |
|                                       | ADC                     | 28                                   | 16 (57.1)                  | 12 (42.9)                            | 10 (35.7)                  | 18 (64.3)                            | 18 (64.3)       | 10 (35.7)                            | 15 (53.6)       | 13 (46.4) |
|                                       | SCC                     | 17                                   | 17 (100) <sup>0.002</sup>  | 0 (0)                                | 13 (76.5) <sup>0.008</sup> | 4 (23.5)                             | 13 (76.5)       | 4 (23.5)                             | 12 (70.6)       | 5 (29.4)  |
| <u>Tumor stage</u>                    |                         |                                      |                            |                                      |                            |                                      |                 |                                      |                 |           |
|                                       | I + II                  | 21                                   | 16 (76.2)                  | 5 (23.8)                             | 10 (52.4)                  | 11 (47.6)                            | 13 (59.1)       | 9 (40.9)                             | 14 (66.7)       | 7 (33.3)  |
|                                       | III + IV                | 23                                   | 16 (69.6)                  | 7 (30.4)                             | 12 (52.2)                  | 11 (47.8)                            | 18 (78.3)       | 5 (21.7)                             | 12 (52.2)       | 11 (47.8) |
| <u>Correlation with protein</u>       |                         |                                      |                            |                                      |                            |                                      |                 |                                      |                 |           |
| IHC                                   | Over expression         |                                      |                            |                                      |                            | 14 (73.7) <sup>0.041</sup>           | 5 (26.3)        | 16 (84) <sup>0.030</sup>             | 3 (16)          |           |
|                                       | Normal expression       |                                      |                            |                                      |                            | 3 (33.3)                             | 6 (66.7)        | 4 (44.4)                             | 5 (55.6)        |           |

<sup>a</sup> The *P* values with significance are shown as superscripts.

<sup>b</sup> Total number of samples in some categories is less than the overall number analyzed because clinical data or molecular data was not available for these samples.

<sup>c</sup> The mRNA overexpression of candidate genes was defined using the mean mRNA expression of normal lung tissue as a cutoff value to determine patients with mRNA overexpression.
